# Supplementary material for: Association between parenteral nutrition–containing intravenous lipid emulsion and bloodstream infections in patients with single‐lumen central venous access: A secondary analysis of a randomized trial
Source: PubMed Central journal article supplement (PMC10946626; doi:10.1002/jpen.2530), 2023-07-10
Supplement: JPEN-47-783-s001.pdf [file JPEN-47-783-s001.pdf]

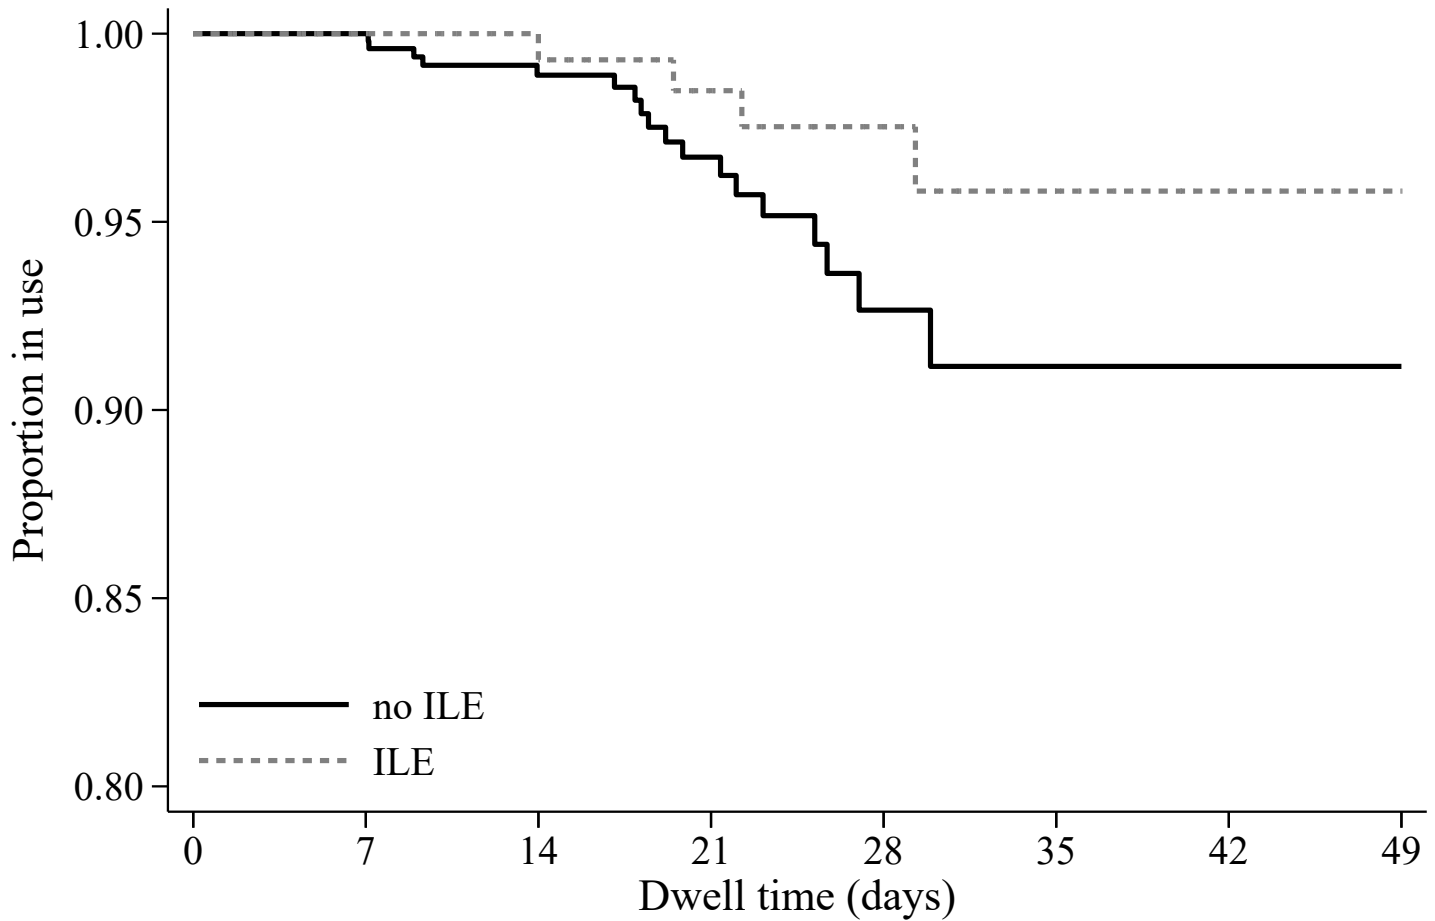

**Number at risk**

|        |     |     |     |     |    |    |    |   |
|--------|-----|-----|-----|-----|----|----|----|---|
| no ILE | 627 | 515 | 376 | 213 | 83 | 32 | 18 | 9 |
| ILE    | 180 | 168 | 143 | 109 | 64 | 27 | 15 | 9 |
